# Supplementary material for: Exploring Early Stages of the Chemical Unfolding of Proteins at the Proteome Scale
Source: PubMed Central journal article supplement (PMC3861036; doi:10.1371/journal.pcbi.1003393), 2013-12-12

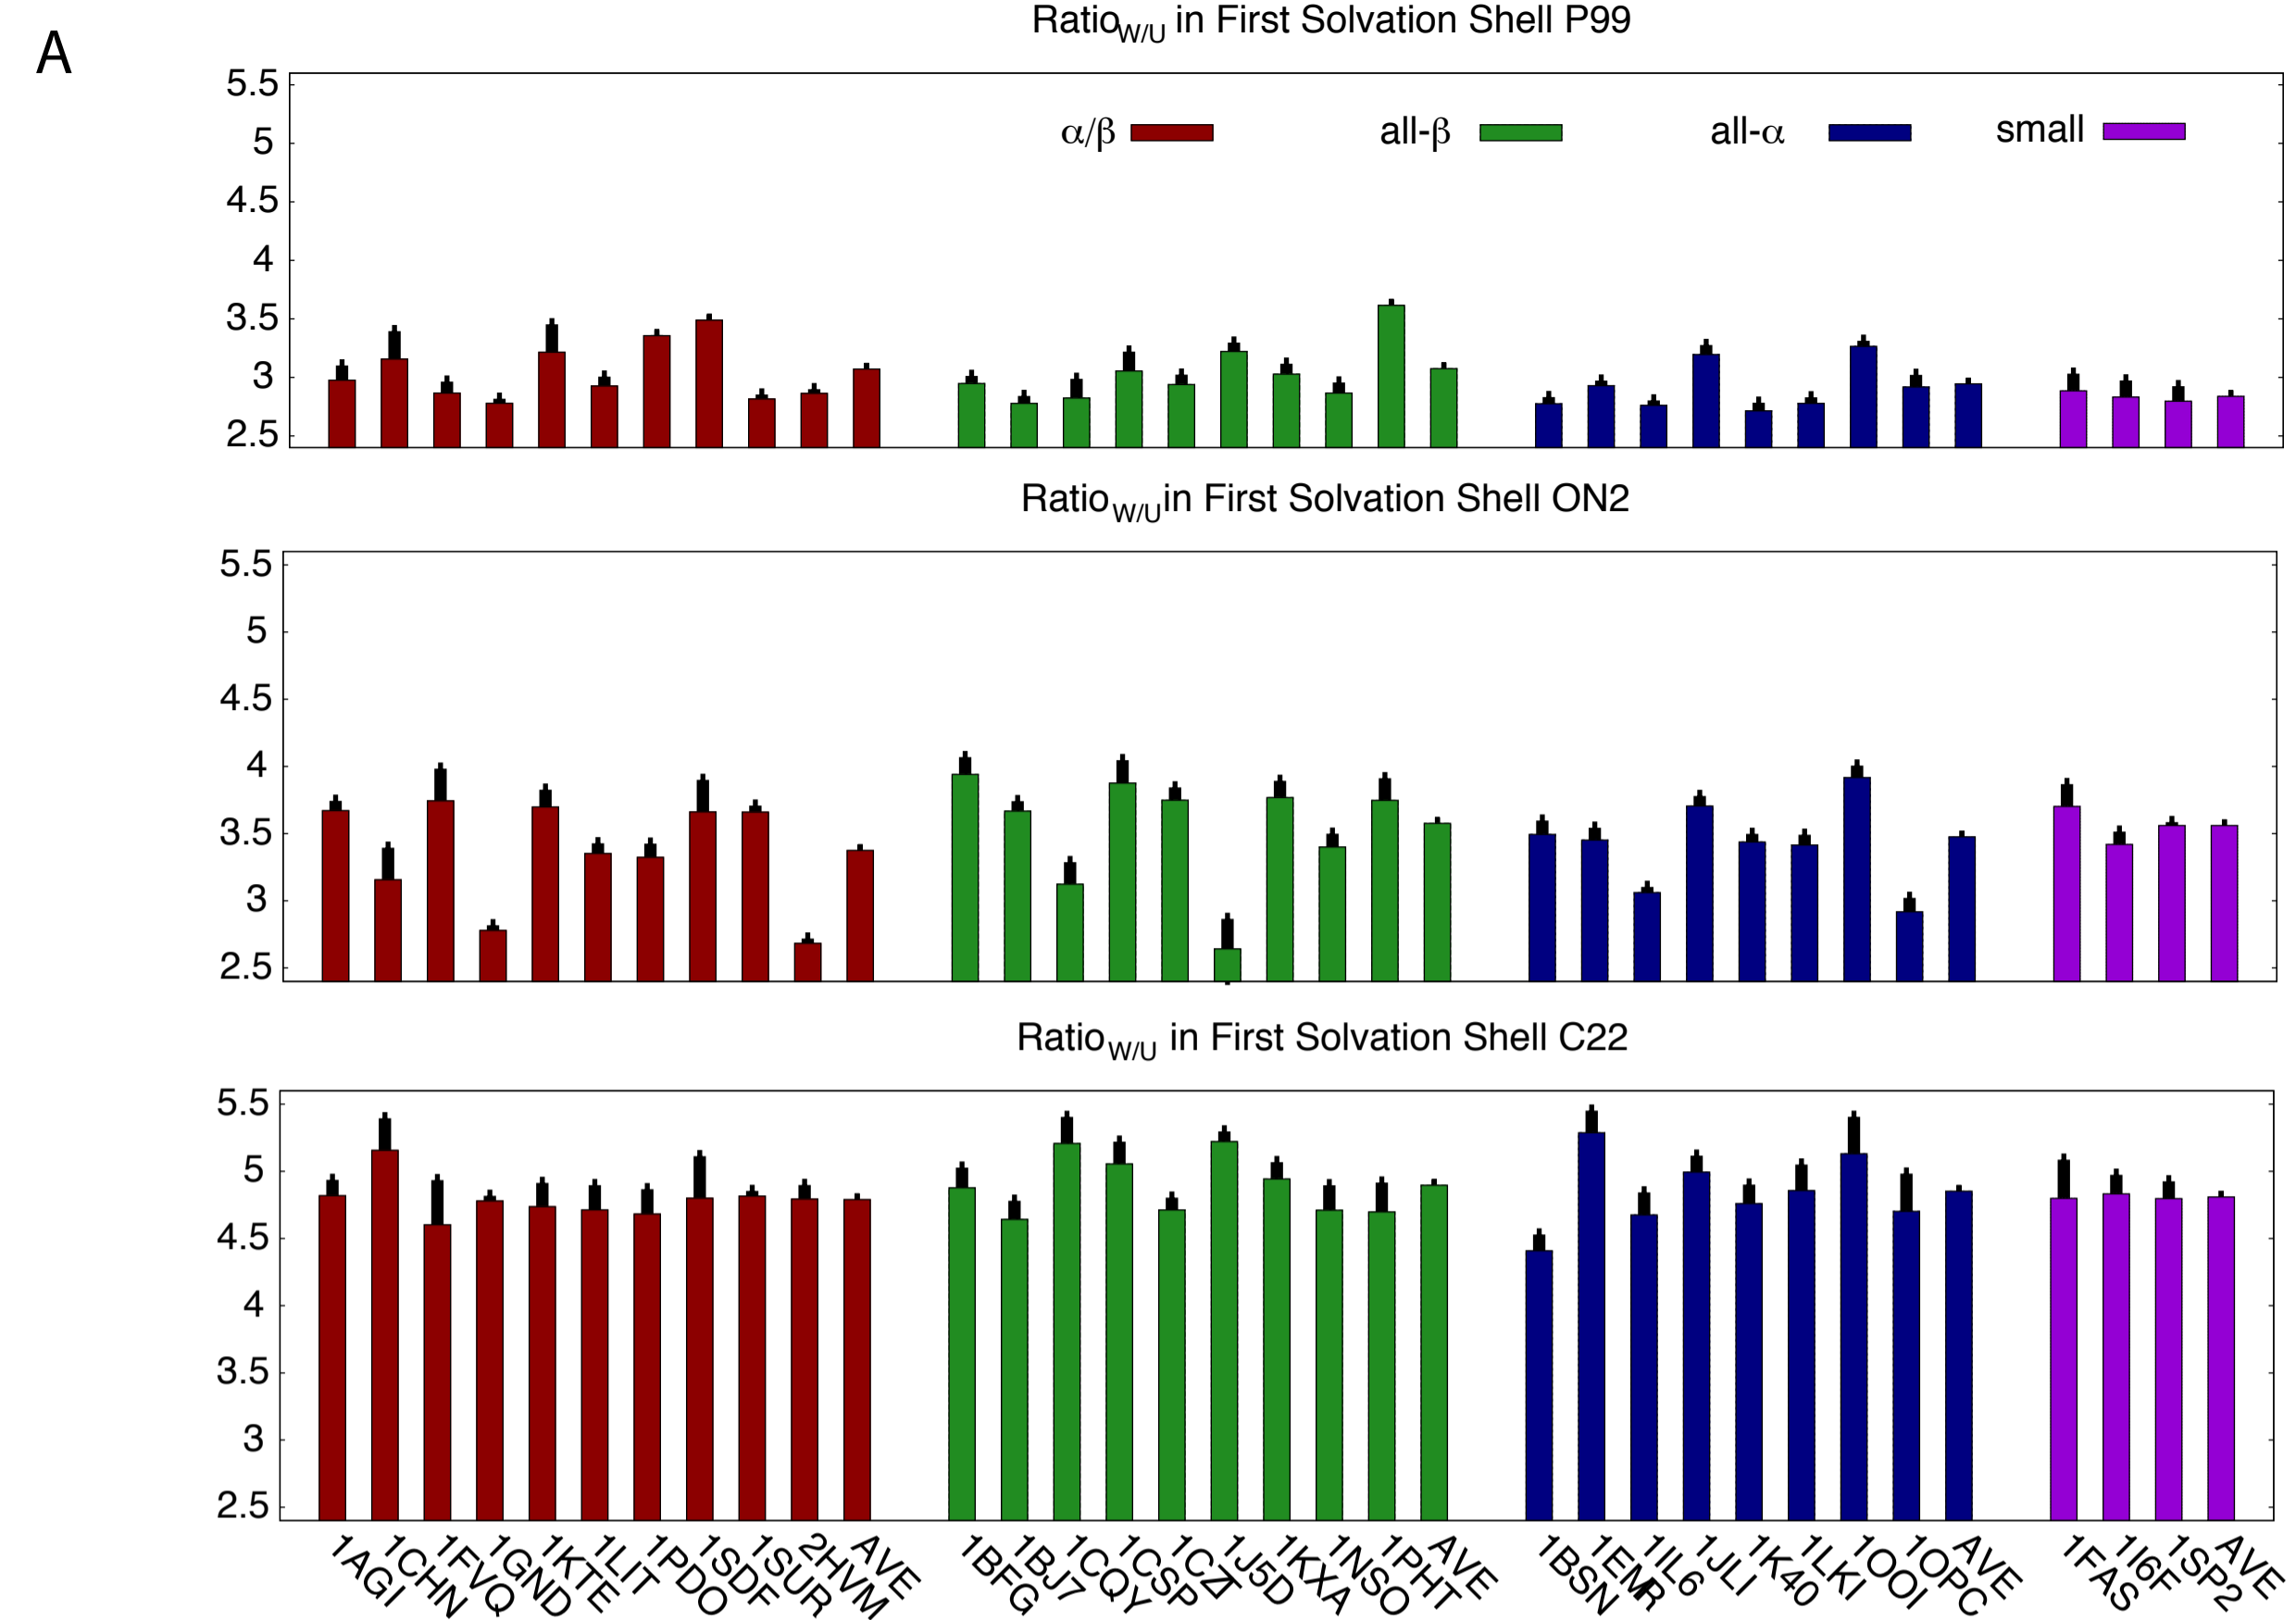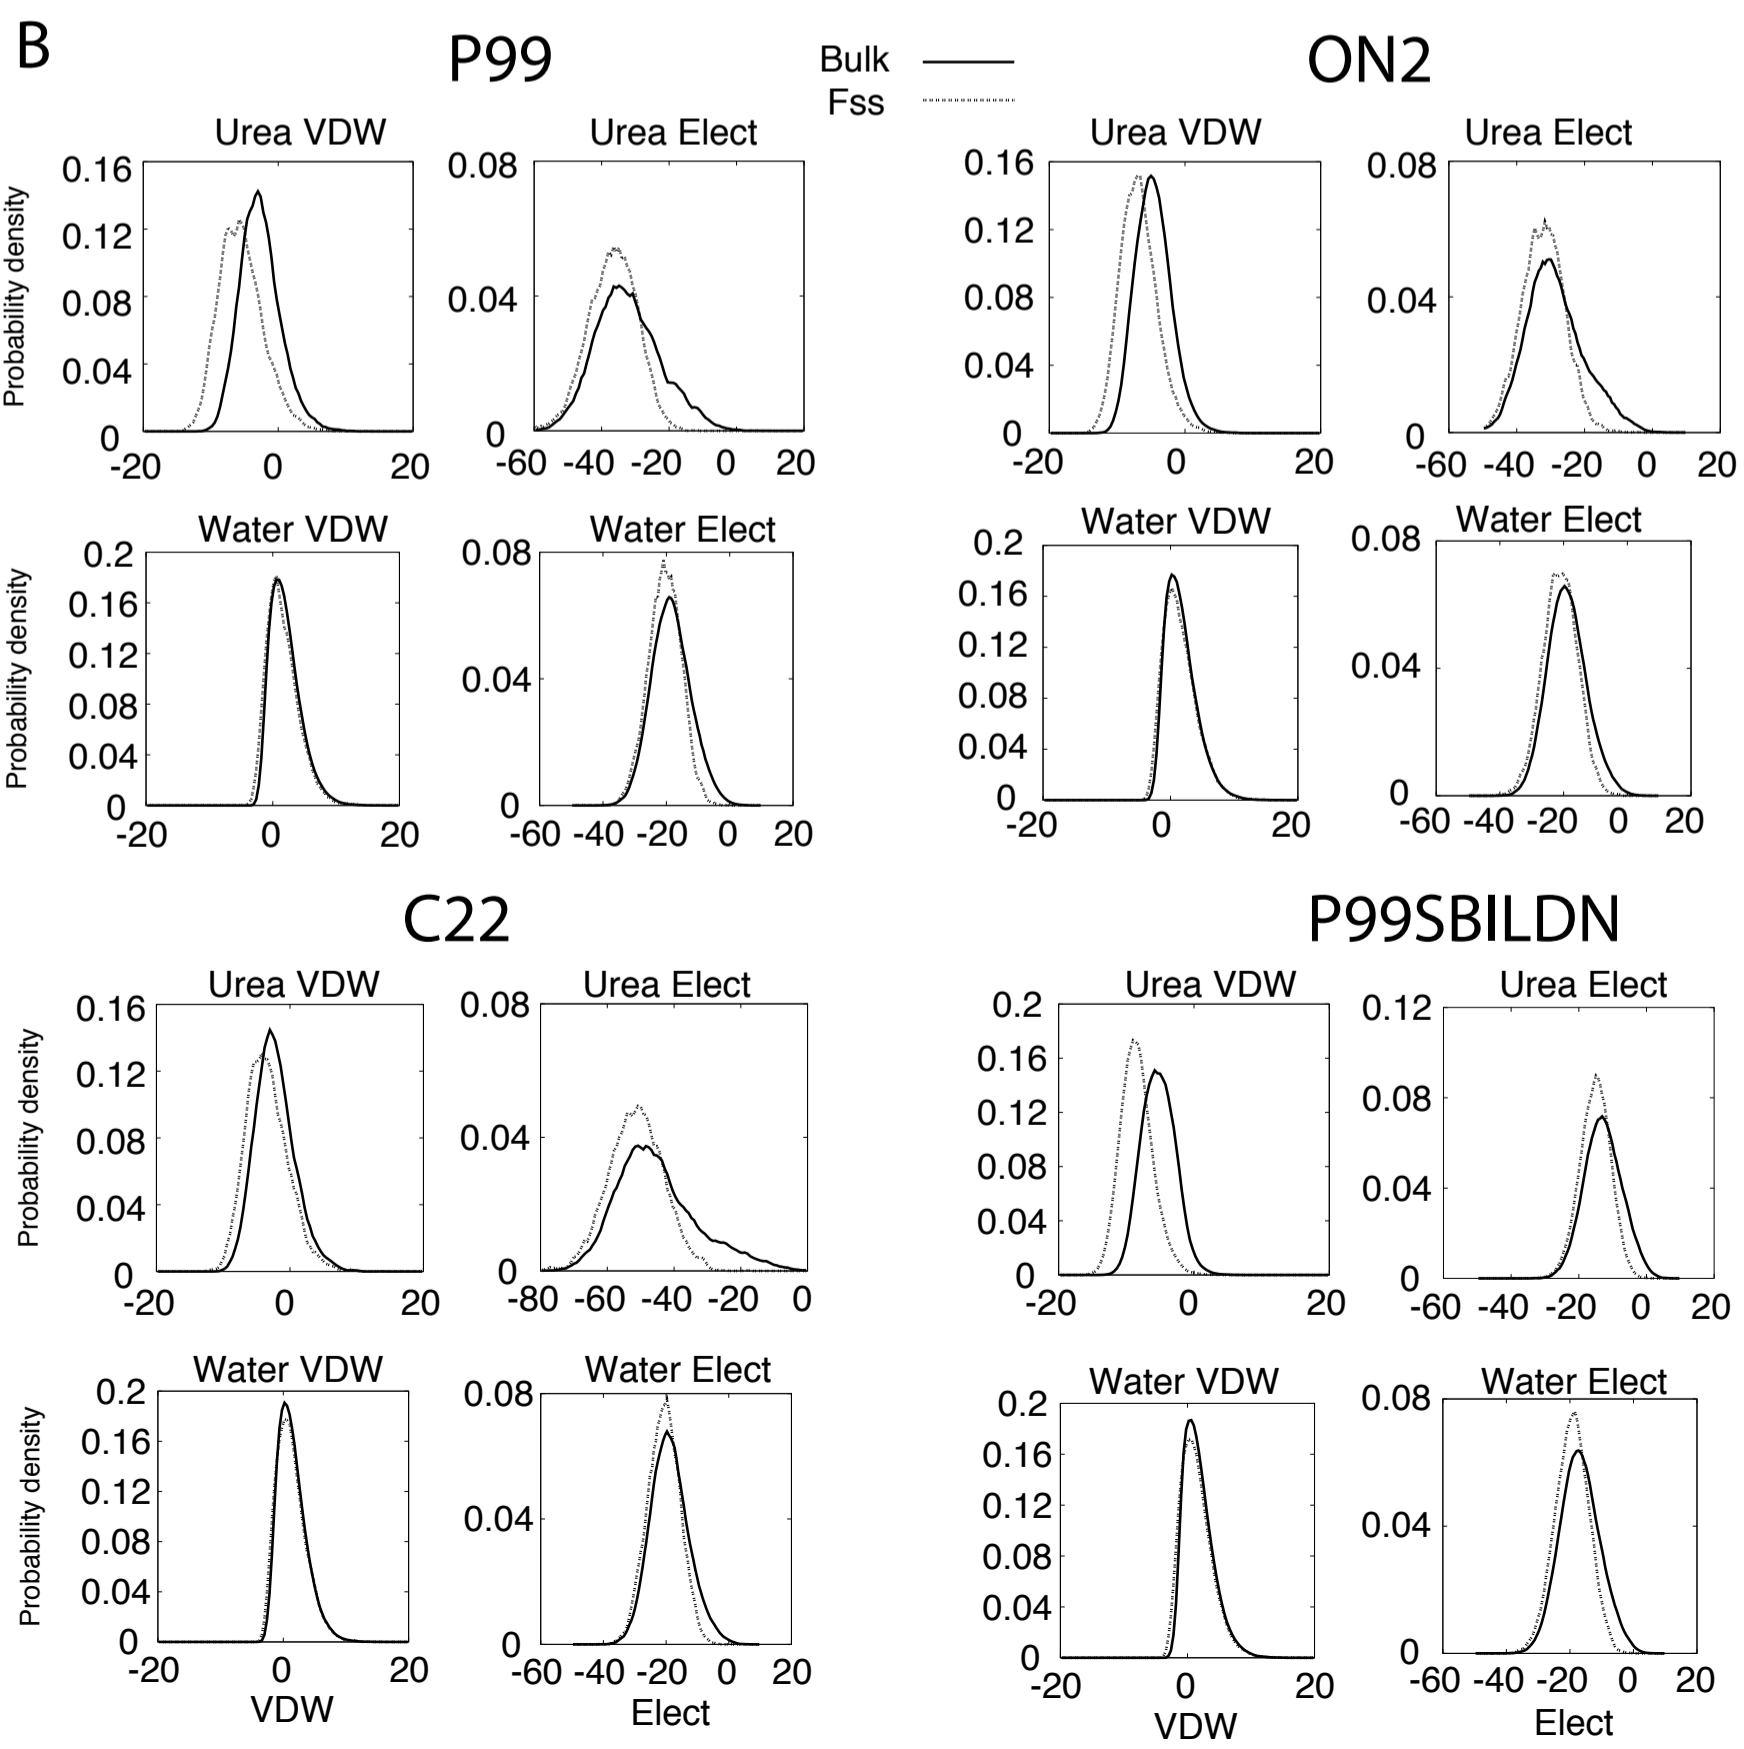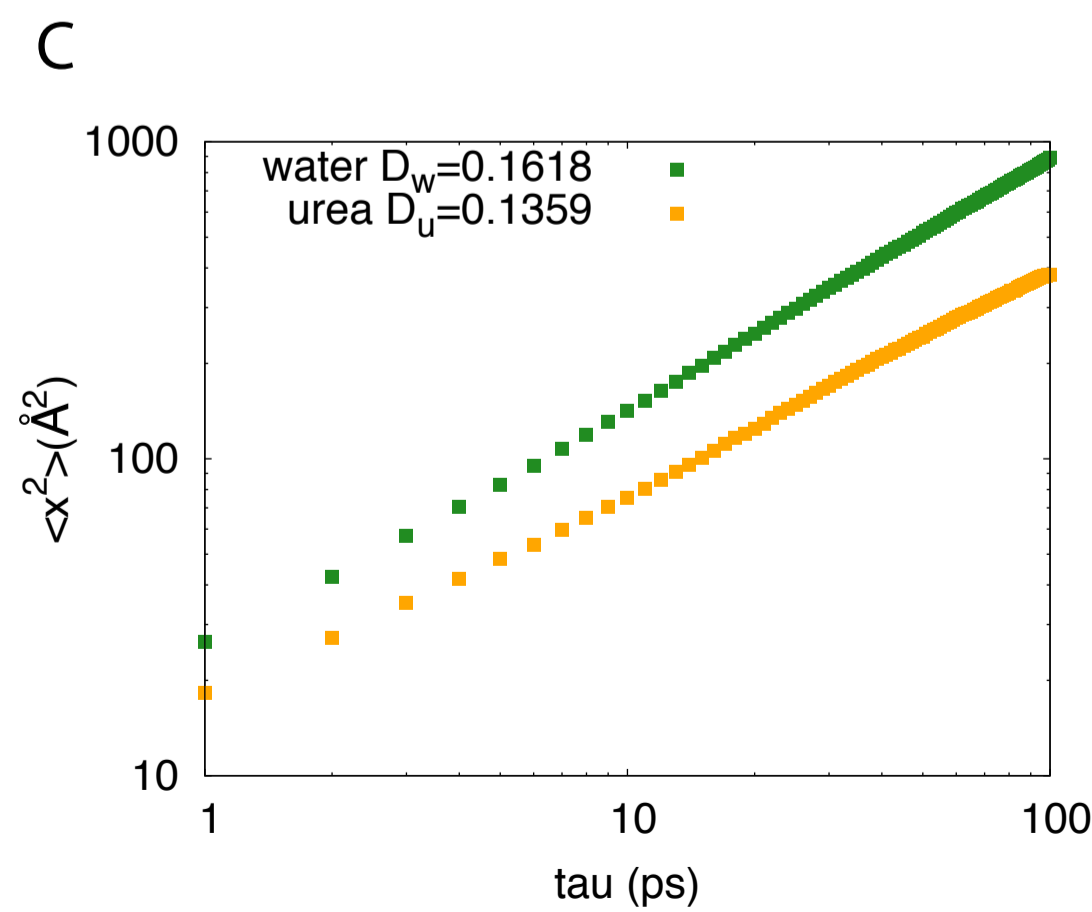

Supplement: pcbi.1003393.s006.pdf [file pcbi.1003393.s006.pdf]
